# Supplementary material
Source: PubMed Central journal article supplement (PMC5320982)
Supplement: pnas.1613375114.sd01.pdf [file pnas.1613375114.sd01.pdf]

**Dataset S1.** Functionality indicators of panicoid rDNA sequences amplified from *Hordeum* and *Pseudoroegneria* accessions. In parentheses are sequence identifiers under which the sequences appear in phylogenetic analysis. M1 – M4 are substitutions within conserved motifs in the 5.8S rDNA gene, M5 are substitutions in the ITS2 motif. M1 – CGATGAAGAACGTAGC, M2 – GAATTGCAGTCC, M3 – TTTGAACGCA, (C/T) at the seventh position is considered as C based on the Panicoideae, Pooideae and Triticeae ITS-rDNA alignments (18), M4 – GATATC, M5 – TGGT. ✓ – motif is present unchanged; substitutions within motifs are indicated by position (number) and substituting nucleotide; n. a. – not analyzed, sequence is not spanning the respective motif. The ability of 5.8S RNA transcripts to fold into a constrained secondary structure is given: ✓ – the RNA molecule is able to form the secondary structure; no – unable to form the secondary structure. Synonymous and compensatory substitutions with respect to 5.8S RNA secondary structures are in green color.

| Accessions and clones                   | rDNA type        | M1   | M2 | M3   | M4 | M5 | constrained<br>2° structure<br>5.8S |
|-----------------------------------------|------------------|------|----|------|----|----|-------------------------------------|
| <b><i>H. bogdanii</i> BCC2063</b>       |                  |      |    |      |    |    |                                     |
| clone 01 (BCC2063 Pan1)                 | <i>Panicum 1</i> | ✓    | ✓  | 7: T | ✓  | ✓  | ✓                                   |
| clone 02                                | <i>Panicum 1</i> | ✓    | ✓  | 7: T | ✓  | ✓  | ✓                                   |
| clone 03                                | <i>Panicum 1</i> | ✓    | ✓  | 7: T | ✓  | ✓  | ✓                                   |
| clone 04                                | <i>Panicum 1</i> | 7: G | ✓  | 7: T | ✓  | ✓  | ✓                                   |
| <b><i>H. bogdanii</i> BCC2070</b>       |                  |      |    |      |    |    |                                     |
| clone 01 (BCC2070 Pan1)                 | <i>Panicum 1</i> | ✓    | ✓  | 7: T | ✓  | ✓  | no                                  |
| clone 02                                | <i>Panicum 1</i> | ✓    | ✓  | 7: T | ✓  | ✓  | no                                  |
| clone 03                                | <i>Panicum 1</i> | ✓    | ✓  | 7: T | ✓  | ✓  | no                                  |
| clone 04                                | <i>Panicum 1</i> | ✓    | ✓  | 7: T | ✓  | ✓  | no                                  |
| <b><i>H. brevisubulatum</i> BCC2016</b> |                  |      |    |      |    |    |                                     |
| clone 01                                | <i>Setaria</i>   | ✓    | ✓  | ✓    | ✓  | ✓  | ✓                                   |
| clone 02                                | <i>Setaria</i>   | ✓    | ✓  | ✓    | ✓  | ✓  | ✓                                   |
| clone 03                                | <i>Setaria</i>   | ✓    | ✓  | ✓    | ✓  | ✓  | ✓                                   |
| clone 04 (BCC2016 Set)                  | <i>Setaria</i>   | ✓    | ✓  | ✓    | ✓  | ✓  | ✓                                   |
| clone 05                                | <i>Setaria</i>   | ✓    | ✓  | ✓    | ✓  | ✓  | ✓                                   |

|                                       |                  |              |      |            |   |      |    |
|---------------------------------------|------------------|--------------|------|------------|---|------|----|
| clone 06                              | <i>Setaria</i>   | ✓            | ✓    | ✓          | ✓ | ✓    | no |
| clone 07                              | <i>Setaria</i>   | ✓            | ✓    | ✓          | ✓ | ✓    | ✓  |
| clone 08 (BCC2016 Pan1)               | <i>Panicum 1</i> | ✓            | ✓    | 7: T       | ✓ | ✓    | ✓  |
| <b><i>H. californicum</i> BCC2057</b> |                  |              |      |            |   |      |    |
| clone 01 (BCC2057 Pas)                | <i>Paspalum</i>  | ✓            | 9: A | 5: G       | ✓ | ✓    | ✓  |
| clone 02 (BCC2057 Eu)                 | <i>Euclasta</i>  | 10: G        | ✓    | ✓          | ✓ | ✓    | ✓  |
| clone 03                              | <i>Euclasta</i>  | ✓            | 2: T | ✓          | ✓ | ✓    | ✓  |
| clone 04                              | <i>Euclasta</i>  | ✓            | ✓    | ✓          | ✓ | 3: A | ✓  |
| <b><i>H. chilense</i> CN27413</b>     |                  |              |      |            |   |      |    |
| clone 01 (CN27413 Pas)                | <i>Paspalum</i>  | 11: T        | 7: T | 7: T       | ✓ | ✓    | ✓  |
| <b><i>H. chilense</i> GRA1000</b>     |                  |              |      |            |   |      |    |
| clone 01                              | <i>Panicum 1</i> | 16: A        | ✓    | 7: T       | ✓ | ✓    | ✓  |
| clone 02 (GRA1000 Pan1)               | <i>Panicum 1</i> | 16: A        | ✓    | 7: T       | ✓ | ✓    | ✓  |
| clone 03                              | <i>Panicum 1</i> | 16: A        | ✓    | 7: T       | ✓ | ✓    | ✓  |
| clone 04                              | <i>Panicum 1</i> | 16: A        | ✓    | 7: T       | ✓ | ✓    | ✓  |
| clone 05 (GRA1000 Pan2)               | <i>Panicum 2</i> | ✓            | ✓    | ✓          | ✓ | ✓    | ✓  |
| clone 06                              | <i>Panicum 2</i> | ✓            | ✓    | ✓          | ✓ | ✓    | ✓  |
| clone 07                              | <i>Panicum 2</i> | ✓            | ✓    | ✓          | ✓ | ✓    | ✓  |
| clone 08                              | <i>Panicum 2</i> | ✓            | ✓    | ✓          | ✓ | ✓    | ✓  |
| clone 09 (GRA1000 Pas)                | <i>Paspalum</i>  | 11: T        | ✓    | ✓          | ✓ | ✓    | ✓  |
| <b><i>H. comosum</i> JB292A</b>       |                  |              |      |            |   |      |    |
| clone 01 (JB292A Pan1)                | <i>Panicum 1</i> | 4: C         | ✓    | 7: T       | ✓ | ✓    | ✓  |
| clone 02                              | <i>Panicum 1</i> | ✓            | ✓    | 7: T       | ✓ | ✓    | ✓  |
| clone 03                              | <i>Panicum 1</i> | ✓            | ✓    | 5: T, 7: T | ✓ | ✓    | ✓  |
| clone 04                              | <i>Paspalum</i>  | 11: T, 16: A | 7: T | ✓          | ✓ | ✓    | ✓  |
| clone 05 (JB292A Pas)                 | <i>Paspalum</i>  | 11: T, 16: A | 7: T | ✓          | ✓ | ✓    | ✓  |

|                                   |                    |              |       |       |       |       |       |
|-----------------------------------|--------------------|--------------|-------|-------|-------|-------|-------|
| clone 06                          | <i>Paspalum</i>    | 11: T, 16: A | ✓     | ✓     | ✓     | ✓     | ✓     |
| clone 07                          | <i>Paspalum</i>    | 11: T, 16: A | ✓     | ✓     | ✓     | ✓     | ✓     |
| clone 08 (JB292A Eu)              | <i>Euclasta</i>    | ✓            | ✓     | 7: T  | ✓     | ✓     | no    |
| clone 09                          | <i>Euclasta</i>    | 12: A        | ✓     | 7: T  | ✓     | ✓     | no    |
| direct sequence (JB292A Pan2-dir) | <i>Panicum 2</i>   | ✓            | ✓     | 7: T  | ✓     | n. a. | ✓     |
| direct sequence (JB292A Set-dir)  | <i>Setaria</i>     | n. a.        | n. a. | n. a. | n. a. | n. a. | n. a. |
| <b>H. comosum JB412</b>           |                    |              |       |       |       |       |       |
| clone 01 (JB412 Pan1)             | <i>Panicum 1</i>   | ✓            | ✓     | 7: T  | ✓     | ✓     | ✓     |
| clone 02 (JB412 Eu)               | <i>Euclasta</i>    | ✓            | ✓     | ✓     | ✓     | ✓     | ✓     |
| clone 03 (JB412 Set)              | <i>Setaria</i>     | 12: A        | ✓     | ✓     | 1: A  | ✓     | no    |
| clone 04                          | <i>Paspalum</i>    | 11: T        | ✓     | ✓     | ✓     | ✓     | ✓     |
| clone 05 (JB412 Pas-a)            | <i>Paspalum</i>    | 11: T        | ✓     | ✓     | ✓     | ✓     | ✓     |
| clone 06 (JB412 Pas-b)            | <i>Paspalum</i>    | 11: T        | ✓     | ✓     | ✓     | ✓     | ✓     |
| direct sequence (JB412 Pan2-dir)  | <i>Panicum 2</i>   | ✓            | ✓     | 7: T  | ✓     | n. a. | ✓     |
| <b>H. cordobense BCC2039</b>      |                    |              |       |       |       |       |       |
| clone 01 (BCC2039 Pan1)           | <i>Panicum 1</i>   | ✓            | ✓     | 7: T  | ✓     | ✓     | ✓     |
| clone 02                          | <i>Panicum 1</i>   | ✓            | ✓     | 7: T  | ✓     | ✓     | ✓     |
| clone 03                          | <i>Paspalum</i>    | 11: T        | ✓     | ✓     | ✓     | ✓     | ✓     |
| clone 04 (BCC2039 Pas)            | <i>Paspalum</i>    | 11: T        | ✓     | ✓     | ✓     | ✓     | ✓     |
| clone 05                          | <i>Paspalum</i>    | 11: T        | ✓     | ✓     | ✓     | ✓     | ✓     |
| clone 06                          | <i>Arundinella</i> | ✓            | ✓     | ✓     | ✓     | ✓     | no    |
| clone 07 (BCC2039 Aru)            | <i>Arundinella</i> | ✓            | ✓     | ✓     | ✓     | ✓     | no    |
| clone 08                          | <i>Arundinella</i> | ✓            | ✓     | ✓     | ✓     | ✓     | no    |
| <b>H. cordobense BCC2067</b>      |                    |              |       |       |       |       |       |
| clone 01 (BCC2067 Pan1)           | <i>Panicum 1</i>   | ✓            | ✓     | 7: T  | ✓     | ✓     | ✓     |
| clone 02                          | <i>Panicum 1</i>   | ✓            | ✓     | 7: T  | ✓     | ✓     | ✓     |

|                                       |                    |             |            |            |      |      |    |
|---------------------------------------|--------------------|-------------|------------|------------|------|------|----|
| clone 03                              | <i>Panicum 1</i>   | ✓           | ✓          | 7: T       | ✓    | ✓    | ✓  |
| clone 04                              | <i>Panicum 1</i>   | ✓           | ✓          | 2: C, 7: T | ✓    | ✓    | ✓  |
| clone 05                              | <i>Panicum 1</i>   | ✓           | ✓          | 7: T       | ✓    | ✓    | ✓  |
| clone 06                              | <i>Panicum 1</i>   | ✓           | 7: T       | 7: T       | ✓    | ✓    | ✓  |
| clone 07                              | <i>Panicum 1</i>   | ✓           | ✓          | 7: T       | ✓    | ✓    | ✓  |
| clone 08                              | <i>Panicum 1</i>   | ✓           | ✓          | 7: T       | ✓    | ✓    | ✓  |
| clone 09                              | <i>Panicum 1</i>   | ✓           | ✓          | 7: T       | ✓    | ✓    | ✓  |
| clone 10                              | <i>Panicum 1</i>   | ✓           | ✓          | 7: T       | ✓    | ✓    | ✓  |
| clone 11 (BCC2067 Pas)                | <i>Paspalum</i>    | 1: T        | ✓          | ✓          | ✓    | ✓    | ✓  |
| clone 12 (BCC2067 Aru)                | <i>Arundinella</i> | ✓           | ✓          | ✓          | ✓    | ✓    | no |
| <b><i>H. erectifolium</i> BCC2026</b> |                    |             |            |            |      |      |    |
| clone 01                              | <i>Setaria</i>     | ✓           | 4: C       | ✓          | 1: A | ✓    | ✓  |
| clone 02                              | <i>Setaria</i>     | ✓           | 4: C       | ✓          | 1: A | ✓    | ✓  |
| clone 03 (BCC2026 Set-a)              | <i>Setaria</i>     | ✓           | 4: C       | ✓          | 1: A | ✓    | ✓  |
| clone 04                              | <i>Setaria</i>     | ✓           | 4: C       | ✓          | 1: A | ✓    | ✓  |
| clone 05                              | <i>Setaria</i>     | ✓           | 4: C, 8: G | ✓          | 1: A | ✓    | ✓  |
| clone 06                              | <i>Setaria</i>     | ✓           | 4: C       | ✓          | 1: A | ✓    | ✓  |
| clone 07                              | <i>Setaria</i>     | ✓           | 4: C       | ✓          | 1: A | ✓    | ✓  |
| clone 08                              | <i>Setaria</i>     | ✓           | 4: C       | ✓          | 1: A | ✓    | ✓  |
| clone 09                              | <i>Setaria</i>     | ✓           | 4: C       | ✓          | 1: A | 1: A | no |
| clone 10                              | <i>Setaria</i>     | ✓           | 4: C       | 1: C       | 1: A | ✓    | ✓  |
| clone 11                              | <i>Setaria</i>     | ✓           | 4: C       | ✓          | 1: A | ✓    | ✓  |
| clone 12 (BCC2026 Set-b)              | <i>Setaria</i>     | 9: G, 12: A | ✓          | ✓          | ✓    | ✓    | no |
| clone 13                              | <i>Setaria</i>     | ✓           | ✓          | ✓          | ✓    | ✓    | no |
| clone 14                              | <i>Setaria</i>     | 9: G, 12: A | ✓          | ✓          | ✓    | ✓    | no |
| clone 15 (BCC2026 Set-c)              | <i>Setaria</i>     | 5: T        | ✓          | ✓          | 1: A | ✓    | ✓  |

|                               |                  |             |       |            |   |   |    |  |
|-------------------------------|------------------|-------------|-------|------------|---|---|----|--|
| clone 16 (BCC2026 Pas)        | <i>Paspalum</i>  | 11: T       | ✓     | ✓          | ✓ | ✓ | ✓  |  |
| <b>H. euclaston BCC2022</b>   |                  |             |       |            |   |   |    |  |
| clone 01                      | <i>Paspalum</i>  | 12: A       | ✓     | 7: T       | ✓ | ✓ | no |  |
| clone 02                      | <i>Paspalum</i>  | 12: A       | ✓     | 7: T       | ✓ | ✓ | no |  |
| clone 03 (BCC2022 Pas)        | <i>Paspalum</i>  | 12: A       | ✓     | 7: T       | ✓ | ✓ | no |  |
| clone 04                      | <i>Paspalum</i>  | 12: A       | ✓     | 7: T       | ✓ | ✓ | no |  |
| clone 05                      | <i>Paspalum</i>  | 12: A       | ✓     | 7: T       | ✓ | ✓ | no |  |
| <b>H. euclaston BCC2029</b>   |                  |             |       |            |   |   |    |  |
| clone 01 (BCC2029 Pas)        | <i>Paspalum</i>  | 11: T       | ✓     | ✓          | ✓ | ✓ | ✓  |  |
| clone 02                      | <i>Paspalum</i>  | 11: T       | ✓     | ✓          | ✓ | ✓ | ✓  |  |
| clone 03 (BCC2029 Eu)         | <i>Euclasta</i>  | ✓           | 7: T  | ✓          | ✓ | ✓ | no |  |
| clone 04                      | <i>Euclasta</i>  | ✓           | 7: T  | ✓          | ✓ | ✓ | no |  |
| clone 05                      | <i>Euclasta</i>  | ✓           | 7: T  | ✓          | ✓ | ✓ | no |  |
| clone 06                      | <i>Euclasta</i>  | ✓           | 7: T  | ✓          | ✓ | ✓ | no |  |
| <b>H. flexuosum BCC2023</b>   |                  |             |       |            |   |   |    |  |
| clone 01 (BCC2023 Pas)        | <i>Paspalum</i>  | 14: G       | ✓     | ✓          | ✓ | ✓ | ✓  |  |
| clone 02 (BCC2023 Pan1)       | <i>Panicum 1</i> | ✓           | ✓     | 5: G, 7: T | ✓ | ✓ | ✓  |  |
| <b>H. flexuosum JB208A</b>    |                  |             |       |            |   |   |    |  |
| clone 01 (JB208A Pas)         | <i>Paspalum</i>  | 11: T       | 13: T | ✓          | ✓ | ✓ | ✓  |  |
| <b>H. intercedens BCC2044</b> |                  |             |       |            |   |   |    |  |
| clone 01                      | <i>Paspalum</i>  | 1: A, 12: A | ✓     | 7: T       | ✓ | ✓ | no |  |
| clone 02                      | <i>Paspalum</i>  | 1: A, 12: A | ✓     | 7: T       | ✓ | ✓ | no |  |
| clone 03 (BCC2044 Pas)        | <i>Paspalum</i>  | 1: A, 12: A | ✓     | 7: T       | ✓ | ✓ | no |  |
| clone 04                      | <i>Paspalum</i>  | 1: A, 12: A | ✓     | 7: T       | ✓ | ✓ | no |  |
| <b>H. intercedens BCC2059</b> |                  |             |       |            |   |   |    |  |
| clone 01 (BCC2059 Pas)        | <i>Paspalum</i>  | 12: A       | ✓     | 7: T       | ✓ | ✓ | no |  |

|                                                   |                  |       |      |            |      |       |    |
|---------------------------------------------------|------------------|-------|------|------------|------|-------|----|
| clone 02                                          | <i>Paspalum</i>  | 12: A | ✓    | 7: T       | ✓    | ✓     | no |
| clone 03                                          | <i>Paspalum</i>  | 12: A | ✓    | 7: T       | ✓    | 4: C  | no |
| <b>H. muticum BCC2014</b>                         |                  |       |      |            |      |       |    |
| clone 01                                          | <i>Euclasta</i>  | 6: G  | ✓    | ✓          | ✓    | ✓     | ✓  |
| clone 02 (BCC2059 Pas)                            | <i>Euclasta</i>  | ✓     | ✓    | ✓          | ✓    | ✓     | ✓  |
| clone 03                                          | <i>Euclasta</i>  | ✓     | ✓    | ✓          | ✓    | ✓     | ✓  |
| direct sequence (BCC2014 Pan1-dir)                | <i>Panicum 1</i> | ✓     | ✓    | ✓          | 7: T | n. a. | ✓  |
| <b>H. muticum BCC2042</b>                         |                  |       |      |            |      |       |    |
| clone 01                                          | <i>Panicum 1</i> | 6: T  | ✓    | 7: T       | ✓    | ✓     | ✓  |
| clone 02                                          | <i>Panicum 1</i> | 6: T  | ✓    | 7: T       | ✓    | ✓     | ✓  |
| clone 03 (BCC2042 Pan1)                           | <i>Panicum 1</i> | 6: T  | ✓    | 7: T       | ✓    | ✓     | ✓  |
| clone 04                                          | <i>Panicum 1</i> | 6: T  | 6: A | 7: T       | ✓    | ✓     | ✓  |
| clone 05                                          | <i>Panicum 1</i> | 6: T  | ✓    | 7: T       | ✓    | ✓     | ✓  |
| clone 06                                          | <i>Panicum 1</i> | 6: T  | ✓    | 5: T, 7: T | ✓    | ✓     | ✓  |
| clone 07                                          | <i>Panicum 1</i> | 6: T  | ✓    | 7: T       | ✓    | ✓     | ✓  |
| clone 08 (BCC2042 Eu)                             | <i>Euclasta</i>  | 16: - | ✓    | 5: C       | ✓    | 3: C  | no |
| clone 09                                          | <i>Euclasta</i>  | 16: - | ✓    | 5: C       | ✓    | 3: C  | no |
| clone 10                                          | <i>Euclasta</i>  | 16: - | ✓    | 5: C       | ✓    | 3: C  | no |
| <b>H. patagonicum subsp. magellanicum BCC2065</b> |                  |       |      |            |      |       |    |
| clone 01 (BCC2065 Eu)                             | <i>Euclasta</i>  | ✓     | ✓    | ✓          | ✓    | ✓     | ✓  |
| clone 02                                          | <i>Euclasta</i>  | ✓     | ✓    | ✓          | ✓    | ✓     | ✓  |
| clone 03                                          | <i>Euclasta</i>  | ✓     | ✓    | ✓          | ✓    | ✓     | ✓  |
| clone 04                                          | <i>Euclasta</i>  | ✓     | ✓    | ✓          | ✓    | ✓     | ✓  |
| clone 05                                          | <i>Paspalum</i>  | 11: T | ✓    | ✓          | ✓    | ✓     | ✓  |
| clone 06                                          | <i>Paspalum</i>  | ✓     | ✓    | ✓          | ✓    | ✓     | ✓  |
| clone 07 (BCC2065 Pas)                            | <i>Paspalum</i>  | 11: T | ✓    | ✓          | ✓    | ✓     | ✓  |

|                                                                |                  |              |      |      |   |       |    |
|----------------------------------------------------------------|------------------|--------------|------|------|---|-------|----|
| clone 08                                                       | <i>Paspalum</i>  | 11: T        | ✓    | ✓    | ✓ | ✓     | ✓  |
| clone 09                                                       | <i>Paspalum</i>  | 11: T        | ✓    | ✓    | ✓ | ✓     | ✓  |
| direct sequence (BCC2065 Pan2-dir)                             | <i>Panicum 2</i> | ✓            | ✓    | ✓    | ✓ | n. a. | ✓  |
| <b><i>H. patagonicum</i> subsp. <i>mustersii</i> BCC2033</b>   |                  |              |      |      |   |       |    |
| clone 01                                                       | <i>Panicum 1</i> | ✓            | ✓    | 7: T | ✓ | ✓     | ✓  |
| clone 02 (BCC2033 Pan1)                                        | <i>Panicum 1</i> | ✓            | ✓    | 7: T | ✓ | ✓     | ✓  |
| clone 03                                                       | <i>Panicum 1</i> | ✓            | ✓    | 7: T | ✓ | ✓     | ✓  |
| clone 04 (BCC2033 Pas)                                         | <i>Paspalum</i>  | 10: C, 12: A | 6: A | ✓    | ✓ | ✓     | no |
| direct sequence (BCC2033 Pan2-dir)                             | <i>Panicum 2</i> | ✓            | ✓    | ✓    | ✓ | n. a. | ✓  |
| <b><i>H. patagonicum</i> subsp. <i>patagonicum</i> BCC2031</b> |                  |              |      |      |   |       |    |
| clone 01                                                       | <i>Paspalum</i>  | 11: T        | ✓    | ✓    | ✓ | ✓     | ✓  |
| clone 02 (BCC2031 Pas)                                         | <i>Paspalum</i>  | 11: T        | ✓    | ✓    | ✓ | ✓     | ✓  |
| clone 03                                                       | <i>Paspalum</i>  | 11: T        | ✓    | ✓    | ✓ | ✓     | ✓  |
| clone 04                                                       | <i>Paspalum</i>  | 11: T        | ✓    | ✓    | ✓ | ✓     | ✓  |
| clone 05                                                       | <i>Paspalum</i>  | 11: T        | ✓    | ✓    | ✓ | ✓     | ✓  |
| clone 06                                                       | <i>Paspalum</i>  | 11: T        | ✓    | ✓    | ✓ | ✓     | ✓  |
| clone 07 (BCC2031 Eu)                                          | <i>Euclasta</i>  | ✓            | ✓    | ✓    | ✓ | ✓     |    |
| clone 08                                                       | <i>Euclasta</i>  | ✓            | ✓    | ✓    | ✓ | ✓     | ✓  |
| clone 09                                                       | <i>Euclasta</i>  | ✓            | ✓    | ✓    | ✓ | ✓     | ✓  |
| clone 10                                                       | <i>Euclasta</i>  | ✓            | ✓    | ✓    | ✓ | ✓     | ✓  |
| clone 11                                                       | <i>Panicum 1</i> | ✓            | ✓    | 7: T | ✓ | ✓     | ✓  |
| clone 12 (BCC2031 Pan1)                                        | <i>Panicum 1</i> | ✓            | ✓    | 7: T | ✓ | ✓     | ✓  |
| clone 13                                                       | <i>Panicum 1</i> | ✓            | ✓    | 7: T | ✓ | ✓     | ✓  |
| clone 14 (BCC2031 Pan2)                                        | <i>Panicum 2</i> | ✓            | ✓    | ✓    | ✓ | ✓     | ✓  |
| clone 15                                                       | <i>Panicum 2</i> | ✓            | ✓    | ✓    | ✓ | ✓     | ✓  |
| clone 16                                                       | <i>Panicum 2</i> | ✓            | ✓    | ✓    | ✓ | ✓     | ✓  |

***H. patagonicum* subsp. *patagonicum***  
**BCC2064**

|                           |                  |       |   |      |   |   |    |
|---------------------------|------------------|-------|---|------|---|---|----|
| clone 01 (BCC2064 Set)    | <i>Setaria</i>   | ✓     | ✓ | ✓    | ✓ | ✓ | ✓  |
| clone 02 (BCC2064 Pas-a)  | <i>Paspalum</i>  | 12: A | ✓ | ✓    | ✓ | ✓ | no |
| clone 03                  | <i>Paspalum</i>  | 11: T | ✓ | ✓    | ✓ | ✓ | ✓  |
| clone 04 (BCC2064 Pas-b)  | <i>Paspalum</i>  | 12: A | ✓ | ✓    | ✓ | ✓ | no |
| clone 05                  | <i>Panicum 1</i> | ✓     | ✓ | 7: T | ✓ | ✓ | ✓  |
| clone 06 (BCC2064 Pan1-a) | <i>Panicum 1</i> | ✓     | ✓ | 7: T | ✓ | ✓ | ✓  |
| clone 07                  | <i>Panicum 1</i> | 15: A | ✓ | 7: T | ✓ | ✓ | ✓  |
| clone 08 (BCC2064 Pan1-b) | <i>Panicum 1</i> | ✓     | ✓ | 7: T | ✓ | ✓ | ✓  |
| clone 09 (BCC2064 Pan2)   | <i>Panicum 2</i> | ✓     | ✓ | 7: T | ✓ | ✓ | ✓  |

***H. patagonicum* subsp. *setifolium***  
**BCC2032**

|                         |                  |       |      |      |      |   |   |
|-------------------------|------------------|-------|------|------|------|---|---|
| clone 01 (BCC2032 Pan2) | <i>Panicum 2</i> | ✓     | ✓    | ✓    | 1: A | ✓ | ✓ |
| clone 02                | <i>Panicum 2</i> | ✓     | ✓    | ✓    | ✓    | ✓ | ✓ |
| clone 03                | <i>Panicum 2</i> | ✓     | ✓    | ✓    | 1: A | ✓ | ✓ |
| clone 04 (BCC2032 Eu)   | <i>Euclasta</i>  | ✓     | ✓    | ✓    | ✓    | ✓ | ✓ |
| clone 05                | <i>Euclasta</i>  | ✓     | ✓    | ✓    | ✓    | ✓ | ✓ |
| clone 06 (BCC2032 Pas)  | <i>Paspalum</i>  | 11: T | ✓    | ✓    | ✓    | ✓ | ✓ |
| clone 07                | <i>Paspalum</i>  | 11: T | 4: C | 7: T | ✓    | ✓ | ✓ |
| clone 08 (BCC2032 Pan1) | <i>Panicum 1</i> | ✓     | ✓    | 7: T | ✓    | ✓ | ✓ |
| clone 09                | <i>Panicum 1</i> | ✓     | ✓    | 7: T | ✓    | ✓ | ✓ |

***H. patagonicum* subsp. *setifolium***  
**BCC2038**

|                          |                |   |   |   |   |   |    |
|--------------------------|----------------|---|---|---|---|---|----|
| clone 01 (BCC2038 Set-a) | <i>Setaria</i> | ✓ | ✓ | ✓ | ✓ | ✓ | ✓  |
| clone 02                 | <i>Setaria</i> | ✓ | ✓ | ✓ | ✓ | ✓ | no |
| clone 03                 | <i>Setaria</i> | ✓ | ✓ | ✓ | ✓ | ✓ | ✓  |
| clone 04                 | <i>Setaria</i> | ✓ | ✓ | ✓ | ✓ | ✓ | ✓  |

|                                     |                  |             |       |            |   |       |    |
|-------------------------------------|------------------|-------------|-------|------------|---|-------|----|
| clone 05                            | <i>Setaria</i>   | ✓           | ✓     | ✓          | ✓ | ✓     | ✓  |
| clone 06                            | <i>Setaria</i>   | ✓           | ✓     | ✓          | ✓ | ✓     | ✓  |
| clone 07                            | <i>Setaria</i>   | ✓           | ✓     | ✓          | ✓ | ✓     | ✓  |
| clone 08                            | <i>Setaria</i>   | ✓           | ✓     | ✓          | ✓ | ✓     | ✓  |
| clone 09                            | <i>Setaria</i>   | ✓           | ✓     | ✓          | ✓ | ✓     | ✓  |
| clone 10 (BCC2038 Set-b)            | <i>Setaria</i>   | 2: A, 11: T | ✓     | ✓          | ✓ | ✓     | no |
| clone 11                            | <i>Setaria</i>   | 2: A, 11: T | ✓     | ✓          | ✓ | ✓     | no |
| clone 12                            | <i>Setaria</i>   | 2: A, 11: T | ✓     | ✓          | ✓ | ✓     | no |
| clone 13                            | <i>Setaria</i>   | 2: A, 11: T | ✓     | ✓          | ✓ | ✓     | no |
| clone 14                            | <i>Setaria</i>   | 2: A, 11: T | ✓     | ✓          | ✓ | ✓     | no |
| clone 15                            | <i>Euclasta</i>  | ✓           | ✓     | ✓          | ✓ | ✓     | ✓  |
| clone 16                            | <i>Euclasta</i>  | ✓           | 13: T | ✓          | ✓ | ✓     | ✓  |
| clone 17 (BCC2038 Eu)               | <i>Euclasta</i>  | ✓           | ✓     | ✓          | ✓ | ✓     | ✓  |
| clone 18                            | <i>Euclasta</i>  | ✓           | ✓     | ✓          | ✓ | ✓     | ✓  |
| clone 19                            | <i>Euclasta</i>  | ✓           | ✓     | ✓          | ✓ | ✓     | ✓  |
| clone 20                            | <i>Euclasta</i>  | ✓           | ✓     | ✓          | ✓ | ✓     | ✓  |
| clone 21 (BCC2038 Pan1)             | <i>Panicum 1</i> | ✓           | ✓     | 7: T, 9: G | ✓ | ✓     | ✓  |
| clone 22 (BCC2038 Pas)              | <i>Paspalum</i>  | 11: T       | ✓     | ✓          | ✓ | ✓     | ✓  |
| direct sequence (BCC2038 Pan2-dir)  | <i>Panicum 2</i> | ✓           | ✓     | ✓          | ✓ | n. a. | ✓  |
| <b><i>H. pubiflorum</i> BCC2068</b> |                  |             |       |            |   |       |    |
| clone 01 (BCC2068 Pan1)             | <i>Panicum 1</i> | ✓           | ✓     | 7: T       | ✓ | ✓     | ✓  |
| clone 02                            | <i>Panicum 1</i> | ✓           | ✓     | 7: T       | ✓ | ✓     | ✓  |
| clone 03 (BCC2068 Pas)              | <i>Paspalum</i>  | 11: T       | ✓     | ✓          | ✓ | ✓     | ✓  |
| clone 04                            | <i>Paspalum</i>  | 11: T       | ✓     | ✓          | ✓ | ✓     | ✓  |
| clone 05                            | <i>Paspalum</i>  | 11: T       | ✓     | ✓          | ✓ | ✓     | ✓  |
| <b><i>H. pubiflorum</i> BCC2028</b> |                  |             |       |            |   |       |    |

|                                      |                  |             |             |      |   |      |    |  |
|--------------------------------------|------------------|-------------|-------------|------|---|------|----|--|
| clone 01 (BCC2028 Pas-a)             | <i>Paspalum</i>  | 11: T       | ✓           | ✓    | ✓ | ✓    | ✓  |  |
| clone 02                             | <i>Paspalum</i>  | 11: T       | 8: G        | ✓    | ✓ | ✓    | ✓  |  |
| clone 03                             | <i>Paspalum</i>  | 11: T       | 8: G        | ✓    | ✓ | ✓    | no |  |
| clone 04                             | <i>Paspalum</i>  | 11: T, 4: C | 8: G        | ✓    | ✓ | ✓    | ✓  |  |
| clone 05                             | <i>Paspalum</i>  | 11: T       | 8: G        | ✓    | ✓ | ✓    | ✓  |  |
| clone 06                             | <i>Paspalum</i>  | 11: T       | 8: G        | ✓    | ✓ | ✓    | ✓  |  |
| clone 07 (BCC2028 Pas-b)             | <i>Paspalum</i>  | 11: T       | 8: G        | ✓    | ✓ | ✓    | ✓  |  |
| clone 08                             | <i>Paspalum</i>  | 11: T       | 8: G        | ✓    | ✓ | ✓    | ✓  |  |
| clone 09                             | <i>Paspalum</i>  | 11: T       | 8: G        | ✓    | ✓ | 3: A | ✓  |  |
| clone 10                             | <i>Paspalum</i>  | 11: T       | 8: G        | ✓    | ✓ | ✓    | no |  |
| clone 11                             | <i>Paspalum</i>  | 11: T       | 8: G        | ✓    | ✓ | ✓    | ✓  |  |
| clone 12                             | <i>Paspalum</i>  | 11: T       | 8: G        | ✓    | ✓ | ✓    | ✓  |  |
| clone 13                             | <i>Paspalum</i>  | 11: T       | 8: G, 13: T | ✓    | ✓ | ✓    | ✓  |  |
| clone 14                             | <i>Paspalum</i>  | 11: T       | 8: G        | ✓    | ✓ | ✓    | ✓  |  |
| clone 15 (BCC2028 Eu)                | <i>Euclasta</i>  | ✓           | ✓           | ✓    | ✓ | ✓    | ✓  |  |
| clone 16                             | <i>Euclasta</i>  | ✓           | 3: G        | ✓    | ✓ | ✓    | ✓  |  |
| clone 17 (BCC2028 Pan2)              | <i>Panicum 2</i> | ✓           | ✓           | ✓    | ✓ | ✓    | ✓  |  |
| clone 18 (BCC2028 Pan1)              | <i>Panicum 1</i> | ✓           | ✓           | 7: T | ✓ | ✓    | ✓  |  |
| clone 19                             | <i>Panicum 1</i> | ✓           | ✓           | 7: T | ✓ | ✓    | ✓  |  |
| <b><i>H. pusillum</i> BCC2043</b>    |                  |             |             |      |   |      |    |  |
| clone 01 (BCC2043 Pas)               | <i>Paspalum</i>  | 2: A, 12: A | 8: G        | 7: T | ✓ | ✓    | no |  |
| clone 02                             | <i>Paspalum</i>  | 2: A, 12: A | 8: G        | 7: T | ✓ | ✓    | no |  |
| clone 03                             | <i>Paspalum</i>  | 2: A, 12: A | 8: G        | 7: T | ✓ | ✓    | no |  |
| <b><i>H. roshevitzii</i> BCC2015</b> |                  |             |             |      |   |      |    |  |
| clone 01 (BCC2015 Pan1)              | <i>Panicum 1</i> | 6: T        | ✓           | 7: T | ✓ | 4: C | ✓  |  |
| clone 02                             | <i>Panicum 1</i> | ✓           | ✓           | 7: T | ✓ | ✓    | ✓  |  |

**H. roshevitzii BCC2069**

|                         |                  |      |       |      |   |   |   |
|-------------------------|------------------|------|-------|------|---|---|---|
| clone 01 (BCC2069 Pan1) | <i>Panicum 1</i> | ✓    | 11: T | 7: T | ✓ | ✓ | ✓ |
| clone 02                | <i>Panicum 1</i> | 5: A | ✓     | 7: T | ✓ | ✓ | ✓ |

**H. stenostachys BCC2021**

|                          |                    |             |      |            |      |   |    |
|--------------------------|--------------------|-------------|------|------------|------|---|----|
| clone 01 (BCC2021 Eu-a)  | <i>Euclasta</i>    | ✓           | ✓    | ✓          | ✓    | ✓ | ✓  |
| clone 02                 | <i>Euclasta</i>    | ✓           | ✓    | ✓          | ✓    | ✓ | ✓  |
| clone 03                 | <i>Euclasta</i>    | ✓           | ✓    | ✓          | ✓    | ✓ | ✓  |
| clone 04 (BCC2021 Eu-b)  | <i>Euclasta</i>    | 2: C        | ✓    | 7: G, 9: - | ✓    | ✓ | no |
| clone 05 (BCC2021 Aru)   | <i>Arundinella</i> | ✓           | ✓    | ✓          | ✓    | ✓ | no |
| clone 06 (BCC2021 Set-a) | <i>Setaria</i>     | 5: T        | ✓    | ✓          | ✓    | ✓ | ✓  |
| clone 07                 | <i>Setaria</i>     | ✓           | ✓    | 7: T       | 1: A | ✓ | no |
| clone 08 (BCC2021 Set-b) | <i>Setaria</i>     | 11: T       | ✓    | ✓          | 1: A | ✓ | no |
| clone 09                 | <i>Setaria</i>     | ✓           | ✓    | ✓          | 1: A | ✓ | no |
| clone 10 (BCC2021 Pan)   | <i>Panicum 1</i>   | ✓           | ✓    | 7: T       | ✓    | ✓ | ✓  |
| clone 11                 | <i>Panicum 1</i>   | ✓           | ✓    | 7: T       | ✓    | ✓ | ✓  |
| clone 12 (BCC2021 Pas-b) | <i>Paspalum</i>    | 1: T, 12: A | 9: A | 4: A       | ✓    | ✓ | no |
| clone 13                 | <i>Paspalum</i>    | 1: T, 12: A | 9: A | 4: A       | ✓    | ✓ | no |
| clone 14                 | <i>Paspalum</i>    | 1: T, 12: A | 9: A | 4: A, 5: G | ✓    | ✓ | no |
| clone 15 (BCC2021 Pas-a) | <i>Paspalum</i>    | 11: T       | ✓    | ✓          | ✓    | ✓ | ✓  |

**H. stenostachys BCC2041**

|                          |                |       |   |      |      |   |   |
|--------------------------|----------------|-------|---|------|------|---|---|
| clone 01                 | <i>Setaria</i> | 11: T | ✓ | ✓    | 1: A | ✓ | ✓ |
| clone 02                 | <i>Setaria</i> | 11: T | ✓ | ✓    | 1: A | ✓ | ✓ |
| clone 03                 | <i>Setaria</i> | 11: T | ✓ | ✓    | 1: A | ✓ | ✓ |
| clone 04 (BCC2041 Set-a) | <i>Setaria</i> | 11: T | ✓ | ✓    | 1: A | ✓ | ✓ |
| clone 05                 | <i>Setaria</i> | 5: T  | ✓ | 9: T | ✓    | ✓ | ✓ |
| clone 06 (BCC2041 Set-b) | <i>Setaria</i> | 5: T  | ✓ | ✓    | ✓    | ✓ | ✓ |

| direct sequence (BCC2041 Pas-dir)        | <i>Paspalum</i> | 12: A | 9: A | ✓ | ✓    | n. a. | ✓  |
|------------------------------------------|-----------------|-------|------|---|------|-------|----|
| <b><i>P. spicata</i> USDA563869</b>      |                 |       |      |   |      |       |    |
| clone 01 ( <i>P. spicata</i> USDA563869) | <i>Setaria</i>  | 1: T  | ✓    | ✓ | ✓    | ✓     | ✓  |
| clone 02                                 | <i>Setaria</i>  | 1: T  | ✓    | ✓ | ✓    | ✓     | ✓  |
| clone 03                                 | <i>Setaria</i>  | 1: T  | ✓    | ✓ | ✓    | ✓     | ✓  |
| clone 04                                 | <i>Setaria</i>  | 1: T  | ✓    | ✓ | 8: A | ✓     | no |
| clone 05                                 | <i>Setaria</i>  | 1: T  | ✓    | ✓ | ✓    | ✓     | ✓  |
| clone 06                                 | <i>Setaria</i>  | 1: T  | ✓    | ✓ | ✓    | ✓     | ✓  |
| clone 07                                 | <i>Setaria</i>  | 1: T  | ✓    | ✓ | ✓    | ✓     | ✓  |
| clone 08                                 | <i>Setaria</i>  | 1: T  | ✓    | ✓ | ✓    | ✓     | ✓  |
| clone 09                                 | <i>Setaria</i>  | 1: T  | ✓    | ✓ | ✓    | ✓     | ✓  |
| clone 10                                 | <i>Setaria</i>  | 1: T  | ✓    | ✓ | ✓    | ✓     | ✓  |
| clone 11                                 | <i>Setaria</i>  | 1: T  | ✓    | ✓ | ✓    | ✓     | ✓  |
| clone 12                                 | <i>Setaria</i>  | 1: T  | ✓    | ✓ | ✓    | ✓     | ✓  |
| clone 13                                 | <i>Setaria</i>  | 1: T  | ✓    | ✓ | ✓    | ✓     | ✓  |
| clone 14                                 | <i>Setaria</i>  | 1: T  | ✓    | ✓ | ✓    | ✓     | ✓  |
| clone 15                                 | <i>Setaria</i>  | 1: T  | ✓    | ✓ | ✓    | 4: C  | ✓  |
| clone 16                                 | <i>Setaria</i>  | 1: T  | ✓    | ✓ | ✓    | 4: C  | ✓  |
| clone 17                                 | <i>Setaria</i>  | 1: T  | ✓    | ✓ | ✓    | ✓     | ✓  |
| clone 18                                 | <i>Setaria</i>  | 1: T  | ✓    | ✓ | ✓    | ✓     | ✓  |
| clone 19                                 | <i>Setaria</i>  | 1: T  | ✓    | ✓ | ✓    | ✓     | ✓  |
| clone 20                                 | <i>Setaria</i>  | 1: T  | ✓    | ✓ | ✓    | ✓     | ✓  |
| clone 21                                 | <i>Setaria</i>  | 1: T  | ✓    | ✓ | ✓    | ✓     | ✓  |
| clone 22                                 | <i>Setaria</i>  | 1: T  | ✓    | ✓ | ✓    | ✓     | ✓  |
| clone 23                                 | <i>Setaria</i>  | 1: G  | ✓    | ✓ | ✓    | ✓     | ✓  |
| clone 24                                 | <i>Setaria</i>  | 1: T  | ✓    | ✓ | ✓    | ✓     | ✓  |

|                                                  |                |       |       |       |       |       |       |
|--------------------------------------------------|----------------|-------|-------|-------|-------|-------|-------|
| clone 25                                         | <i>Setaria</i> | 1: T  | ✓     | ✓     | ✓     | ✓     | ✓     |
| clone 26                                         | <i>Setaria</i> | 1: T  | ✓     | ✓     | ✓     | ✓     | ✓     |
| clone 27                                         | <i>Setaria</i> | 1: T  | ✓     | ✓     | ✓     | ✓     | ✓     |
| clone 28                                         | <i>Setaria</i> | 1: T  | ✓     | ✓     | ✓     | ✓     | ✓     |
| clone 29                                         | <i>Setaria</i> | 1: T  | ✓     | ✓     | ✓     | ✓     | ✓     |
| clone 30                                         | <i>Setaria</i> | 1: T  | ✓     | ✓     | ✓     | ✓     | ✓     |
| clone 31                                         | <i>Setaria</i> | 1: T  | ✓     | ✓     | ✓     | ✓     | ✓     |
| clone 32                                         | <i>Setaria</i> | 1: T  | ✓     | ✓     | ✓     | ✓     | ✓     |
| clone 33                                         | <i>Setaria</i> | 1: T  | ✓     | ✓     | ✓     | ✓     | ✓     |
| clone 34                                         | <i>Setaria</i> | 1: T  | ✓     | ✓     | ✓     | ✓     | ✓     |
| clone 35                                         | <i>Setaria</i> | 1: T  | ✓     | ✓     | ✓     | ✓     | ✓     |
| clone 36                                         | <i>Setaria</i> | 1: T  | ✓     | ✓     | ✓     | ✓     | ✓     |
| clone 37                                         | <i>Setaria</i> | 1: T  | ✓     | ✓     | ✓     | ✓     | ✓     |
| clone 38                                         | <i>Setaria</i> | 1: T  | ✓     | ✓     | ✓     | ✓     | ✓     |
| clone 39                                         | <i>Setaria</i> | 1: T  | ✓     | ✓     | ✓     | ✓     | no    |
| clone 40                                         | <i>Setaria</i> | 1: T  | ✓     | ✓     | ✓     | ✓     | ✓     |
| clone 41                                         | <i>Setaria</i> | 1: T  | ✓     | ✓     | ✓     | ✓     | ✓     |
| clone 42                                         | <i>Setaria</i> | 1: T  | ✓     | ✓     | ✓     | ✓     | ✓     |
| <b><i>P. spicata</i> USDA632464</b>              |                |       |       |       |       |       |       |
| direct sequence (P. spicata USDA632464 Set-dir)  | <i>Setaria</i> | n. a. |
| <b><i>P. strigosa</i> USDA499637</b>             |                |       |       |       |       |       |       |
| direct sequence (P. strigosa USDA499637 Set-dir) | <i>Setaria</i> | n. a. |
